# Supplementary material for: Microfluidic-Based Cationic Cholesterol Lipid siRNA Delivery Nanosystem: Highly Efficient In Vitro Gene Silencing and the Intracellular Behavior
Source: MDPI journal article supplement (doi:10.3390/ijms23073999), 2022-04-03
Supplement: s1 [file s1]

Supplementary Material of

# Microfluidic-Based Cationic Cholesterol Lipid siRNA Delivery Nanosystem: Highly Efficient In Vitro Gene Silencing and the Intracellular Behavior

Zhaoyuan Zhu <sup>1</sup>, Li Zhang <sup>2</sup>, Ruilong Sheng <sup>3,\*</sup> and Jian Chen <sup>1,\*</sup>

<sup>1</sup> School of Pharmacy, Shanghai Jiao Tong University, No.800, Dongchuan Road, Shanghai 200240, China; zzygracephar0703@sjtu.edu.cn

<sup>2</sup> Instrumental Analysis Center, Shanghai Jiao Tong University, No.800, Dongchuan Road, Shanghai 200240, China; lizhang09@sjtu.edu.cn

<sup>3</sup> CQM-Centro de Quimica da Madeira, Universidade da Madeira, Campus da Penteada, 9000-390 Funchal, Madeira, Portugal

\* Corresponding: ruilong.sheng@staff.uma.pt (R.S.); chenjian@sjtu.edu.cn (J.C.)

Figure S1. Synthesis routes and molecular structures of Cho-lys-es lipids

Figure S2. Nuclear magnetic resonance spectrum of Chol-es-Lys

Figure S3. Luciferase gene silencing efficiencies of CEL/siRNA nanocomplexes with different concentrations

Table S1. The hydrodynamic sizes of the particles in the media of 10% FBS

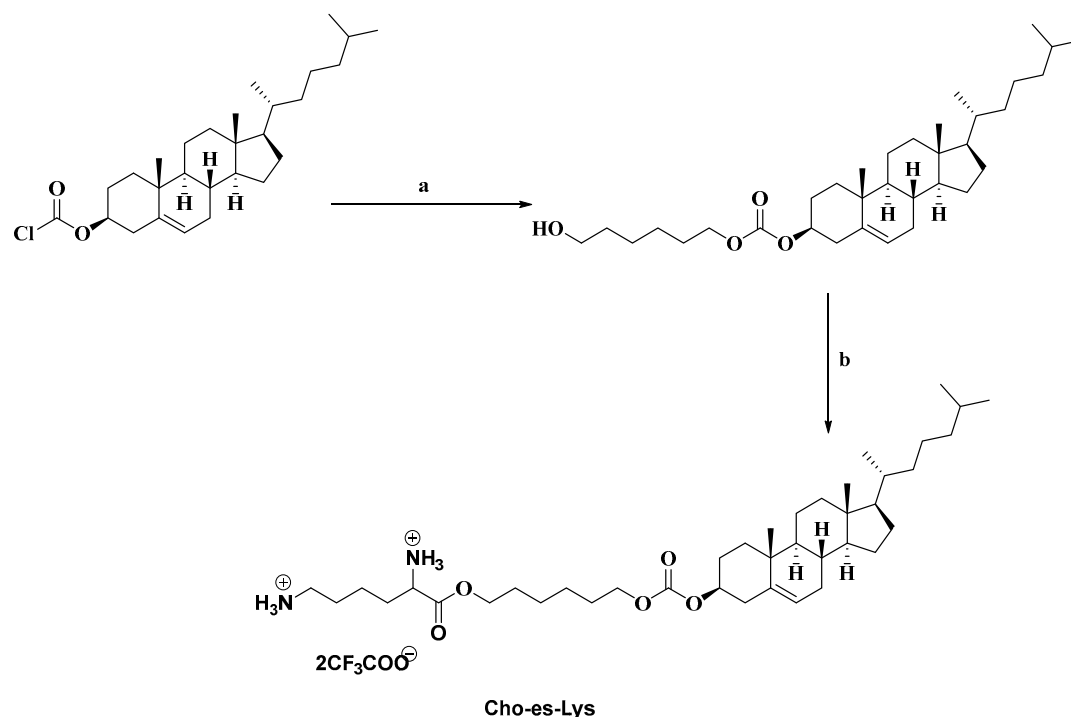

Figure S1. Synthesis routes and molecular structures of Cho-lys-es lipids

(a) 1,6-hexanediol,  $\text{CH}_2\text{Cl}_2$ /pyridine, 12h, r.t. (b) 1.  $\text{N}\alpha$ -, $\text{N}\epsilon$ -bis-Boc-L-lysine, DCC/DMAP,  $\text{CH}_2\text{Cl}_2$ , 24 h, r.t.; 2. trifluoroacetic acid,  $0^\circ\text{C}$ ,  $\text{CH}_2\text{Cl}_2$ , 0.5h.

The synthesis of Cho-es-Lys lipid could be accomplished within several simple and facile steps.<sup>1</sup> First, cholesteryl chloroformate was reacted with excess of 1,6-hexanediol to prepare Cholest-5-en-3-yl hexanoate (Cho-es-OH) as a precursor in 74% yield, which was then acylated with L-2,6-bis((tert-butoxycarbonyl)amino) hexanoic acid ( $\text{N}\alpha$ -, $\text{N}\epsilon$ -bis-Boc-L-lysine). After that, the Boc groups were deprotected in TFA at  $0^\circ\text{C}$  to produce two carbon-ate ester linkage bearing cholesterol cationic lipids Cho-es-Lys (yield: 62%)

1.R. Sheng, T. Luo, H. Li, J. Sun, Z. Wang and A. Cao, *Colloids And Surfaces B-Biointerfaces*, **2014**, *116*, 32-40.

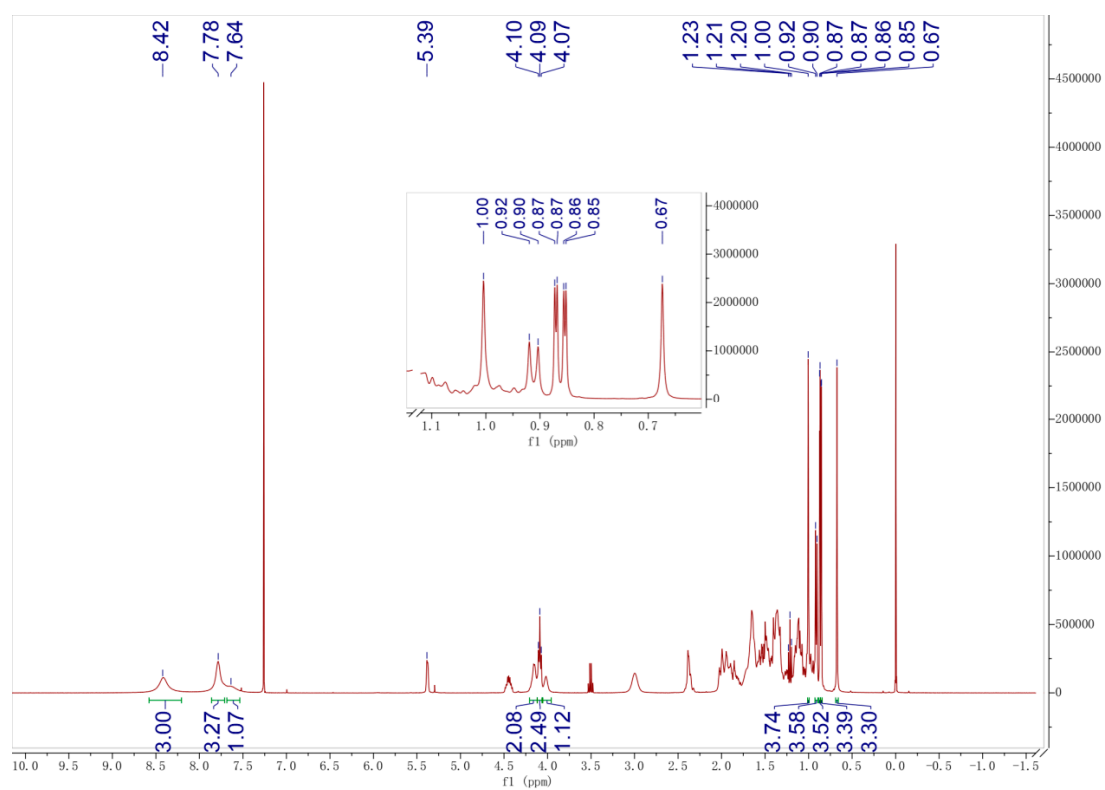

Figure S2. nuclear magnetic resonance spectrum of Chol-es-Lys

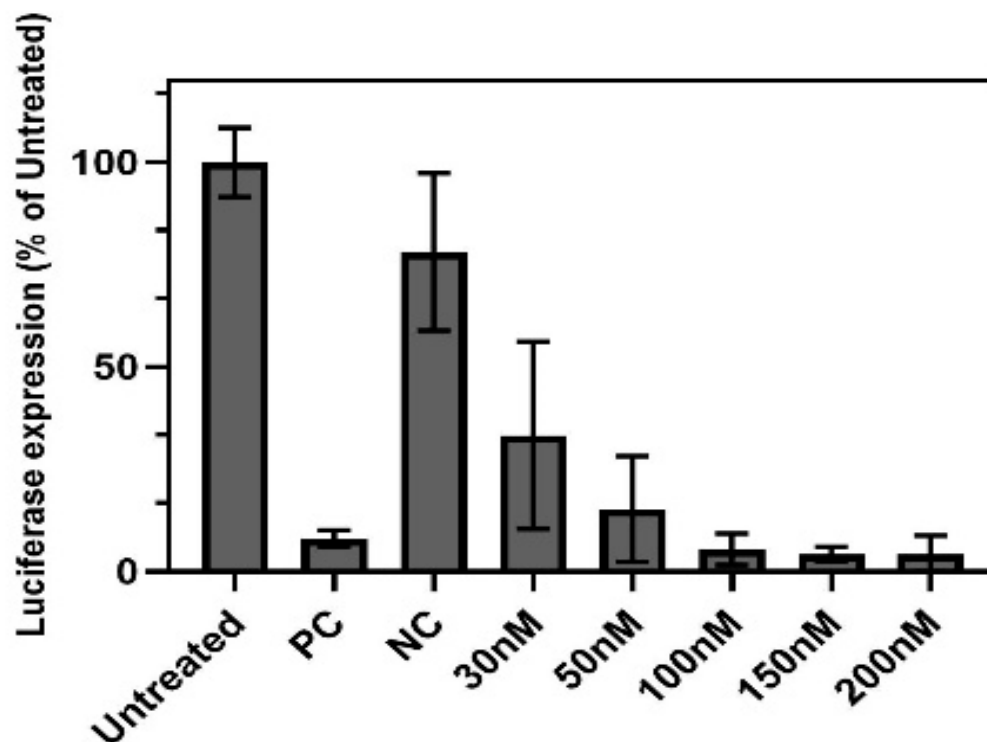

Figure S3. Luciferase gene silencing efficiencies of CEL/siRNA nanocomplexes with different concentrations

PC, lipofectamine 2000 as positive control in 100nM; NC, CEL/NC-siRNA nanocomplexes as negative control. CEL, Chol-es-Lys.

Table S1. The hydrodynamic sizes of the particles in the media of 10% FBS

| Time | Hydrodynamic sizes of the particles (nm) | PDI   |
|------|------------------------------------------|-------|
| 0h   | 125.4 ± 4.4                              | 0.213 |
| 4h   | 129.8 ± 14.5                             | 0.252 |
| 24h  | 375.0 ± 37.6                             | 0.338 |
| 72h  | 812.8 ± 102.1                            | 0.359 |
